# Supplementary material
Source: HighWire-hosted journal article supplement (https://www.jpn.ca/highwire/filestream/89847/field_highwire_adjunct_files/0/jpn-110119-1-at.pdf)
Supplement: jpn-110119-1-at.pdf [file jpn-110119-1-at.pdf]

**Appendix 1** to Palaniyappan L, Liddle P.F. Aberrant cortical gyrification in schizophrenia: a surface-based morphometry study. *J Psychiatry Neurosci* 2012.

DOI: 10.1503/jpn.110119

Copyright © 2012 The Author(s) or their employer(s). To receive this resource in an accessible format, please contact us at [cmajgroup@cmaj.ca](mailto:cmajgroup@cmaj.ca).

**Box S1: Exclusion criteria for motion artifacts in MPRAGE acquisition**

Scans with at least 1 of the following 3 criteria were excluded owing to motion artifacts:

- Images too grainy: grey–white matter boundary is clearly invisible in more than 2 anatomically distinct regions
- Significant edge ringing artifacts: more than 2 rings noted with associated blurring of grey–white matter boundary in more than 2 anatomically distinct regions
- Less severe motion artifacts/grainy image but not satisfying criteria 1 and 2, but either
  - fails Freesurfer cortical reconstruction owing to substantial topological defects; or
  - presence of more than 2 handles/holes that require manual intervention (e.g. hole-filling, defining control points, removal of obscure/uncertain pia-like tissue) to define grey–white matter boundaries despite Freesurfer's automatic topological fixation procedure

MPRAGE = magnetization-prepared rapid-acquisition gradient echo.
